# Supplementary material for: Anion photoelectron spectroscopy and quantum chemical calculations of bimetallic niobium–aluminum clusters NbAln−/0 (n = 3–12): identification of a half-encapsulated symmetric structure for NbAl12−
Source: Royal Society of Chemistry journal article supplement (doi:10.1039/d2cp04978c), 2023-01-01
Supplement: d2cp04978c1.pdf [file d2cp04978c1.pdf]

## *Supplementary Material*

### **Anion photoelectron spectroscopy and quantum chemical calculations of bimetallic niobium-aluminum clusters $\text{NbAl}_n^{-/0}$ ( $n = 3-12$ ): Identification of half-encapsulated symmetric structure for $\text{NbAl}_{12}^-$**

Shuai-Ting Yan,<sup>1,2</sup> Zhen-Chao Long,<sup>1,2</sup> Xi-Ling Xu,<sup>1,2</sup> Hong-Guang Xu,<sup>1,2</sup> Wei-Jun Zheng<sup>1,2\*</sup>

<sup>1</sup> *Beijing National Laboratory for Molecular Sciences (BNLMS), State Key Laboratory of Molecular Reaction Dynamics, Institute of Chemistry, Chinese Academy of Sciences, Beijing 100190, China*

<sup>2</sup> *University of Chinese Academy of Sciences, Beijing 100049, China*

\* Corresponding author. E-mail: [zhengwj@iccas.ac.cn](mailto:zhengwj@iccas.ac.cn)

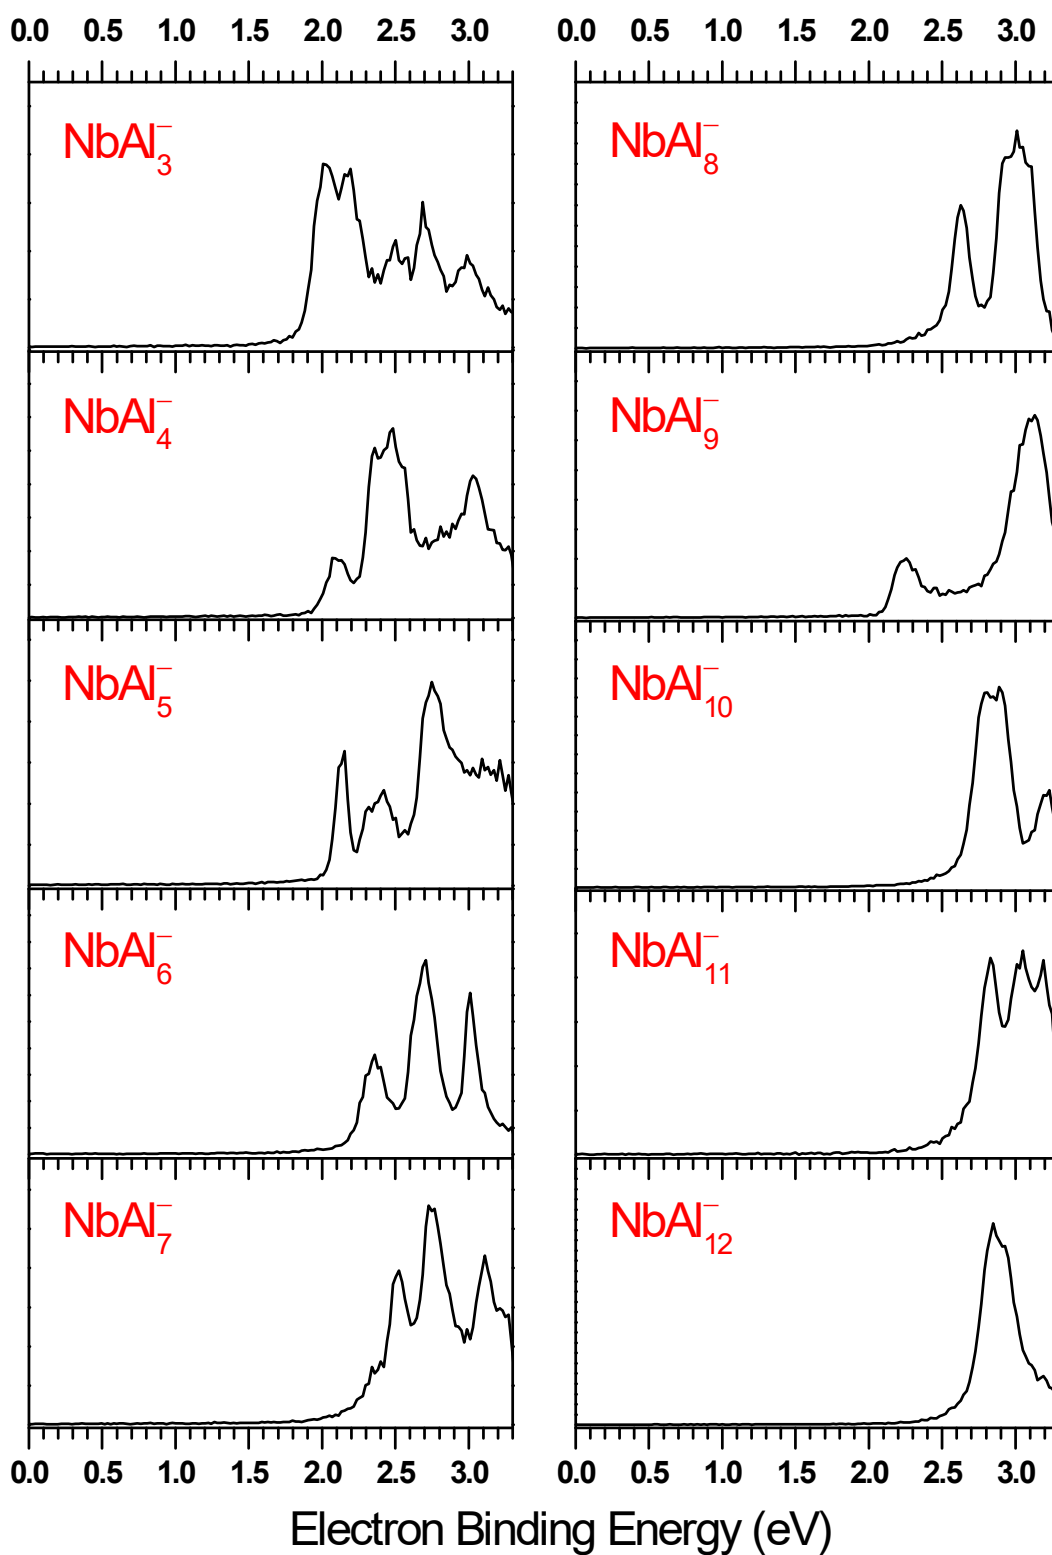

**Fig. S1.** Photoelectron spectra of  $\text{NbAl}_n^-$  ( $n = 3-12$ ) clusters recorded with 355 nm photons.

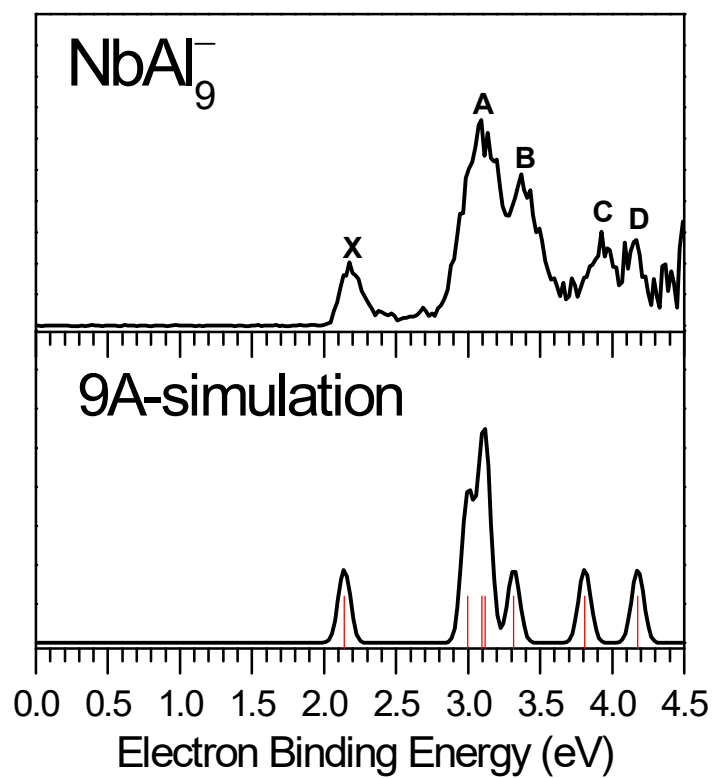

**Fig. S2.** Comparison between the experimental photoelectron spectrum and the simulated spectrum of the lowest-lying isomer of NbAl<sub>9</sub><sup>-</sup> (9A) using a combined  $\Delta$ SCF-TDDFT approach.

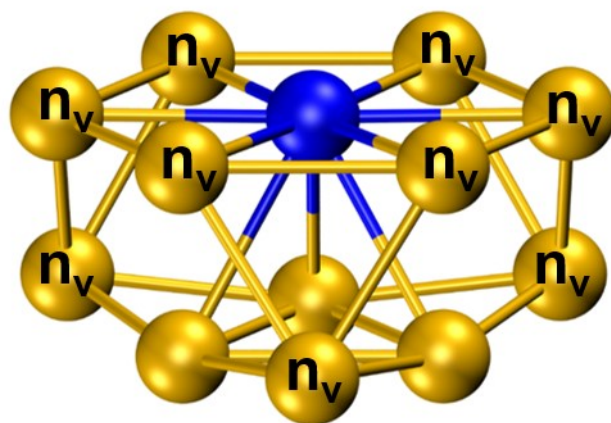

**Fig. S3.** The most stable structure of NbAl<sub>12</sub><sup>-</sup> (12A) and these obvious vertex atoms are marked as  $n_v$ .

**Table S1.** The average binding energies( $E_b$ ), the second order energy difference ( $\Delta_2E$ ) and the splitting energy of Al atom ( $\Delta E_{Al}$ ) values for the most stable isomers of NbAl $_n^{-/0}$  ( $n = 3-12$ ) clusters.

| Number of<br>Al atoms, $n$ | $E_b$ /eV |         | $\Delta_2E$ /eV |         | $\Delta E_{Al}$ /eV |         |
|----------------------------|-----------|---------|-----------------|---------|---------------------|---------|
|                            | anionic   | neutral | anionic         | neutral | anionic             | neutral |
| 3                          | 2.35      | 2.02    | ---             | ---     | ---                 | ---     |
| 4                          | 2.53      | 2.25    | 0.75            | 0.79    | 3.26                | 3.15    |
| 5                          | 2.53      | 2.27    | -0.99           | -1.04   | 2.51                | 2.36    |
| 6                          | 2.67      | 2.43    | 0.81            | 0.69    | 3.50                | 3.40    |
| 7                          | 2.67      | 2.46    | -0.10           | 0.24    | 2.69                | 2.70    |
| 8                          | 2.69      | 2.46    | -0.54           | -1.23   | 2.80                | 2.47    |
| 9                          | 2.75      | 2.59    | 0.22            | 1.04    | 3.34                | 3.70    |
| 10                         | 2.78      | 2.59    | 0.40            | -0.13   | 3.12                | 2.66    |
| 11                         | 2.78      | 2.61    | -0.81           | -0.60   | 2.72                | 2.79    |
| 12                         | 2.84      | 2.67    | ---             | ---     | 3.53                | 3.38    |

**Table S2.** Cartesian coordinates for stable isomers of  $\text{NbAl}_n^-$  ( $n = 3-12$ ) clusters.

| <b><math>\text{NbAl}_3^-</math></b> |             |             |             |    |             |             |             |
|-------------------------------------|-------------|-------------|-------------|----|-------------|-------------|-------------|
| <b>3A</b>                           |             |             | <b>3B</b>   |    |             |             |             |
|                                     | X           | Y           | Z           |    | X           | Y           | Z           |
| Nb                                  | -0.96928700 | -0.00078900 | 0.06881100  | Nb | -0.00000000 | -0.00000000 | 0.71880600  |
| Al                                  | 0.92229500  | -1.54049000 | -0.80113700 | Al | 0.00000000  | 0.00000000  | -1.73997800 |
| Al                                  | 1.21599100  | 0.00284200  | 1.38788800  | Al | 0.00000000  | 2.35348400  | -0.26351200 |
| Al                                  | 0.91869700  | 1.54013700  | -0.80377000 | Al | -0.00000000 | -2.35348400 | -0.26351200 |
| <b>3C</b>                           |             |             |             |    |             |             |             |
|                                     | X           | Y           | Z           |    | X           | Y           | Z           |
| Nb                                  | -1.40092700 | 0.00000600  | -0.00001100 |    |             |             |             |
| Al                                  | 2.93063600  | 0.00000400  | -0.00003300 |    |             |             |             |
| Al                                  | 0.74384700  | 1.39122800  | 0.00003300  |    |             |             |             |
| Al                                  | 0.74382500  | -1.39125100 | 0.00003300  |    |             |             |             |
| <b><math>\text{NbAl}_4^-</math></b> |             |             |             |    |             |             |             |
| <b>4A</b>                           |             |             | <b>4B</b>   |    |             |             |             |
|                                     | X           | Y           | Z           |    | X           | Y           | Z           |
| Nb                                  | 0.00125200  | -0.91207000 | 0.00028000  | Nb | 0.00007900  | -0.46426700 | -0.00008800 |
| Al                                  | 2.27192200  | 0.38838500  | 0.00009100  | Al | -1.51619000 | 1.60346800  | -0.00010100 |
| Al                                  | -0.00117000 | 1.05083700  | -1.55837800 | Al | 1.51580800  | 1.60377000  | 0.00014600  |
| Al                                  | -0.00145200 | 1.05194400  | 1.55750700  | Al | 2.53258400  | -0.87142900 | 0.00004200  |
| Al                                  | -2.27324700 | 0.38536200  | -0.00010200 | Al | -2.53245000 | -0.87158200 | 0.00019000  |
| <b>4C</b>                           |             |             |             |    |             |             |             |
|                                     | X           | Y           | Z           |    | X           | Y           | Z           |
| Al                                  | 0.61426400  | 1.59397700  | -0.59901500 |    |             |             |             |
| Al                                  | 0.41847200  | -0.00094300 | 1.65721800  |    |             |             |             |
| Al                                  | 0.61365100  | -1.59313400 | -0.60031200 |    |             |             |             |
| Al                                  | 2.64251200  | -0.00024100 | -0.14487500 |    |             |             |             |
| Nb                                  | -1.35989500 | 0.00010800  | -0.09924900 |    |             |             |             |

### NbAl<sub>5</sub><sup>-</sup>

| <b>5A</b> |             |             | <b>5B</b>   |    |             |             |             |
|-----------|-------------|-------------|-------------|----|-------------|-------------|-------------|
|           | X           | Y           | Z           | X  | Y           | Z           |             |
| Al        | -0.21723900 | 0.97929000  | -1.39865400 | Al | -1.31269900 | 1.69636100  | -0.13942200 |
| Nb        | 0.83994200  | -0.91103600 | -0.00017300 | Nb | -0.00011900 | -0.53868800 | -0.62254700 |
| Al        | -2.55579500 | 0.99209100  | -0.00001200 | Al | 1.31285800  | 1.69642300  | -0.13891300 |
| Al        | 2.05597900  | 1.38944700  | -0.00016900 | Al | -2.50041900 | -0.77181000 | 0.20064800  |
| Al        | -0.21618800 | 0.97922900  | 1.39902100  | Al | 0.00026600  | -0.15000300 | 1.84100000  |
| Al        | -1.71580400 | -1.46679000 | 0.00035800  | Al | 2.50037100  | -0.77203100 | 0.20010300  |

  

| <b>5C</b> |             |             |             |
|-----------|-------------|-------------|-------------|
|           | X           | Y           | Z           |
| Al        | 0.52293800  | 0.00054000  | -1.26567300 |
| Nb        | -1.81129400 | 0.00032000  | -0.12631300 |
| Al        | 0.03397800  | -1.55566000 | 0.85419800  |
| Al        | 2.56049900  | 1.31049400  | -0.02365200 |
| Al        | 2.56008500  | -1.31073100 | -0.02272200 |
| Al        | 0.03504300  | 1.55434700  | 0.85622200  |

### NbAl<sub>6</sub><sup>-</sup>

| <b>6A</b> |             |             | <b>6B</b>   |    |             |             |             |
|-----------|-------------|-------------|-------------|----|-------------|-------------|-------------|
|           | X           | Y           | Z           | X  | Y           | Z           |             |
| Nb        | -1.63568000 | -0.00056800 | 0.00014000  | Nb | -1.07973000 | -0.02426000 | -0.41808500 |
| Al        | 0.45168100  | -0.00003500 | -1.44802300 | Al | -1.03605100 | 2.35283800  | 0.62174300  |
| Al        | 2.36986100  | 1.31229700  | -0.00010800 | Al | 0.50754200  | 0.01004300  | 1.61662200  |
| Al        | -0.24405000 | 2.22255500  | -0.00067000 | Al | 0.99683900  | 1.48419000  | -0.92860900 |
| Al        | 2.37136500  | -1.31073200 | 0.00027500  | Al | 1.06240600  | -1.43618400 | -0.93221100 |
| Al        | -0.24175900 | -2.22302100 | -0.00039900 | Al | -0.92690200 | -2.39674300 | 0.62232600  |
| Al        | 0.45158400  | 0.00072800  | 1.44848300  | Al | 2.80146900  | 0.06236600  | 0.31870600  |

  

| <b>6C</b> |             |             |             |
|-----------|-------------|-------------|-------------|
|           | X           | Y           | Z           |
| Nb        | -0.62313800 | -0.90784600 | -0.22435400 |
| Al        | -1.56617800 | 1.24214100  | -1.24756700 |
| Al        | 1.71520700  | -1.37866800 | 0.74643000  |
| Al        | -2.35037500 | 0.39291100  | 1.35573800  |
| Al        | 0.18033300  | 1.31615400  | 0.92918900  |
| Al        | 2.73071300  | 1.07891600  | 0.47120300  |
| Al        | 1.25558200  | 0.21175200  | -1.54741300 |

# NbAl<sub>7</sub><sup>-</sup>

| <b>7A</b> |             |             |             | <b>7B</b> |             |             |             |
|-----------|-------------|-------------|-------------|-----------|-------------|-------------|-------------|
|           | X           | Y           | Z           |           | X           | Y           | Z           |
| Nb        | 1.28243100  | -0.69860900 | -0.41514200 | Al        | 1.85506400  | 2.29842000  | -0.06651700 |
| Al        | -0.34401900 | 0.40488700  | 1.34502200  | Al        | -1.56684000 | 0.56311500  | 1.67862100  |
| Al        | -0.74646400 | -2.18413700 | 0.50001400  | Al        | 1.74515300  | -2.16320300 | 0.35851800  |
| Al        | -1.05384500 | -0.33504800 | -1.47430200 | Al        | -2.88787300 | 0.09781500  | -0.70167400 |
| Al        | 0.63871800  | 1.81106700  | -0.89433700 | Al        | 1.75661400  | -0.02149600 | -1.33124200 |
| Al        | -1.92631200 | 1.89579400  | -0.19033800 | Al        | 1.13880600  | 0.35712100  | 1.48854000  |
| Al        | -2.86008200 | -0.41193300 | 0.66199100  | Al        | -0.58767000 | 1.68854100  | -0.69065400 |
| Al        | 2.24741200  | 1.02267700  | 1.36124300  | Nb        | -0.46078900 | -0.89424600 | -0.23323700 |

  

| <b>7C</b> |             |             |             |
|-----------|-------------|-------------|-------------|
|           | X           | Y           | Z           |
| Nb        | 1.89120500  | -0.00110400 | -0.35240000 |
| Al        | 0.27503400  | 0.00016300  | 1.66303700  |
| Al        | -1.84878200 | -1.36148700 | 0.77439000  |
| Al        | -1.84590500 | 1.36494400  | 0.77169100  |
| Al        | 0.61537000  | -2.22149100 | 0.13731700  |
| Al        | 0.61939300  | 2.22151900  | 0.13700200  |
| Al        | -0.50407700 | -0.00017600 | -1.24064900 |
| Al        | -3.27560100 | 0.00001100  | -1.13137300 |



# NbAl<sub>8</sub><sup>-</sup>

| <b>8A</b> |             |             |             | <b>8B</b> |             |             |             |
|-----------|-------------|-------------|-------------|-----------|-------------|-------------|-------------|
|           | X           | Y           | Z           |           | X           | Y           | Z           |
| Nb        | 1.42683100  | 0.00171200  | -0.00009700 | Nb        | -0.86407300 | 0.92274400  | 0.00007400  |
| Al        | -0.17142400 | -1.77190900 | -1.29229400 | Al        | -1.08855800 | -1.30417700 | -1.42070800 |
| Al        | -2.73327900 | 0.99467400  | 0.81399300  | Al        | 1.22996700  | 0.10244800  | -1.41727000 |
| Al        | -2.72700000 | -1.00123000 | -0.81524000 | Al        | 1.28623100  | 2.41703300  | -0.00026700 |
| Al        | -0.78578800 | 0.81677200  | -1.16372400 | Al        | 1.23016800  | 0.10308200  | 1.41723400  |
| Al        | 1.44353300  | -2.49076300 | 0.86419000  | Al        | -3.24118700 | -0.15197200 | -0.00003700 |
| Al        | -0.17897300 | 1.76968100  | 1.29205600  | Al        | 0.96796800  | -2.16482700 | 0.00023500  |
| Al        | -0.78500300 | -0.81829000 | 1.16213600  | Al        | -1.08837300 | -1.30421700 | 1.42068000  |
| Al        | 1.43792900  | 2.49566600  | -0.86081300 | Al        | 3.42893800  | -0.60756200 | -0.00009900 |
| <b>8C</b> |             |             |             |           |             |             |             |
|           | X           | Y           | Z           |           | X           | Y           | Z           |
| Al        | -0.11005400 | -1.43670100 | 1.62632700  |           |             |             |             |
| Al        | -1.45049300 | -2.60400700 | -0.42145400 |           |             |             |             |
| Al        | -1.45051100 | 2.60399000  | -0.42149300 |           |             |             |             |
| Al        | 3.23220300  | -0.00001400 | -0.98228000 |           |             |             |             |
| Nb        | -1.28616100 | -0.00001200 | -0.29344000 |           |             |             |             |
| Al        | -0.11009100 | 1.43673200  | 1.62630300  |           |             |             |             |
| Al        | 0.95221600  | -1.33654300 | -0.98485200 |           |             |             |             |
| Al        | 2.04087300  | 0.00004500  | 1.46778000  |           |             |             |             |
| Al        | 0.95220900  | 1.33653500  | -0.98486700 |           |             |             |             |

# NbAl<sub>9</sub><sup>-</sup>

| <b>9A</b> |             |             | <b>9B</b>   |    |             |             |             |
|-----------|-------------|-------------|-------------|----|-------------|-------------|-------------|
|           | X           | Y           | Z           |    | X           | Y           | Z           |
| Nb        | -0.00027600 | -0.00111400 | -1.23645000 | Al | 0.70362600  | -1.33442900 | -1.41254800 |
| Al        | 0.78155800  | 2.51194300  | -0.61204000 | Al | 0.69674600  | 1.34208200  | -1.41242200 |
| Al        | 1.78618500  | -1.93395300 | -0.60932300 | Nb | -1.49298800 | -0.00164900 | -0.89379000 |
| Al        | 2.34680700  | 0.52989100  | 0.14298700  | Al | -0.81396700 | -2.25363700 | 0.78260200  |
| Al        | -1.63189000 | 1.76665700  | 0.14278800  | Al | 1.86206600  | -2.42529800 | 0.71121900  |
| Al        | 0.47310800  | 1.52245500  | 1.76599500  | Al | 0.54480700  | 0.00086200  | 1.12229700  |
| Al        | -0.71383300 | -2.29585500 | 0.14631300  | Al | 1.85049200  | 2.43025000  | 0.71633900  |
| Al        | 1.08053700  | -1.16780900 | 1.76680100  | Al | -0.82732900 | 2.24712300  | 0.78742700  |
| Al        | -2.56784400 | -0.58044200 | -0.61055400 | Al | -2.13258800 | -0.00891600 | 1.71628800  |
| Al        | -1.55375900 | -0.34937200 | 1.76660700  | Al | 2.82480000  | 0.00716300  | -0.19232600 |

  

| <b>9C</b> |             |             |             |
|-----------|-------------|-------------|-------------|
|           | X           | Y           | Z           |
| Al        | -0.01828100 | 1.37438700  | -1.15333900 |
| Al        | 1.24970700  | 2.80047100  | 0.89615100  |
| Al        | -1.09500600 | -1.48759900 | 1.36900200  |
| Al        | 2.64790600  | 1.32923300  | -0.77547700 |
| Al        | 2.64243700  | -1.33357600 | -0.77942300 |
| Al        | 1.24496900  | -2.80170300 | 0.89715800  |
| Al        | -0.02360700 | -1.37724000 | -1.15164800 |
| Al        | -1.09039600 | 1.48904500  | 1.36825700  |
| Al        | 1.10703000  | -0.00169100 | 1.05630100  |
| Nb        | -2.11321700 | 0.00275000  | -0.54758000 |

# NbAl<sub>10</sub><sup>-</sup>

| <b>10A</b> |             |             | <b>10B</b>  |    |             |             |             |
|------------|-------------|-------------|-------------|----|-------------|-------------|-------------|
|            | X           | Y           | Z           | X  | Y           | Z           |             |
| Nb         | -0.00003600 | -0.00246100 | -1.15698500 | Al | -2.67206900 | -0.22234200 | -1.33832400 |
| Al         | -1.34707800 | -2.10023100 | -0.09973200 | Al | 1.03313900  | 2.56195700  | 0.81637800  |
| Al         | 2.71944700  | -0.00206600 | -1.25343200 | Al | -1.04563300 | 1.89661400  | -0.64345500 |
| Al         | 1.34865700  | -2.09980300 | -0.09990000 | Al | -2.77281200 | 0.66694100  | 1.14911900  |
| Al         | -1.34877200 | 2.09859000  | -0.10885000 | Al | -1.63051700 | -1.73263900 | 0.88722600  |
| Al         | -0.00065100 | 1.32400300  | 1.96402600  | Al | 1.82057200  | 1.25161100  | -1.25599300 |
| Al         | -2.26052500 | 0.00197000  | 1.32013800  | Al | 2.30038600  | 0.22935500  | 1.35320500  |
| Al         | 0.00077200  | -1.31375700 | 1.96853000  | Al | 2.56935000  | -1.25309500 | -0.76797100 |
| Al         | -2.71969700 | -0.00350000 | -1.25316200 | Al | -0.31520100 | 0.40438600  | 1.75984300  |
| Al         | 1.34719100  | 2.09912200  | -0.10866300 | Nb | -0.04777200 | -0.55353000 | -1.02113500 |
| Al         | 2.26077100  | 0.00343600  | 1.31999800  | Al | 0.86345100  | -2.05703900 | 1.26047600  |

  

| <b>10C</b> |             |             |             |
|------------|-------------|-------------|-------------|
|            | X           | Y           | Z           |
| Nb         | -0.12240600 | -0.34923500 | -1.11998900 |
| Al         | -0.10608600 | 1.12272500  | 1.53841200  |
| Al         | 0.90437600  | 2.11531200  | -0.90925200 |
| Al         | -2.77082500 | -0.61931500 | -0.94383400 |
| Al         | -1.09609000 | -1.59224200 | 1.19584600  |
| Al         | 1.02725400  | -2.48124800 | -0.09269700 |
| Al         | 1.64248000  | -0.84252500 | 1.74265900  |
| Al         | 2.54154300  | -0.32937100 | -1.01967300 |
| Al         | -1.70336600 | 1.84669600  | -0.45094400 |
| Al         | -2.63669100 | 0.44732700  | 1.54796800  |
| Al         | 2.58345600  | 1.43407400  | 0.92378800  |

# NbAl<sub>11</sub><sup>-</sup>

| 11A |             |             | 11B         |    |             |             |             |
|-----|-------------|-------------|-------------|----|-------------|-------------|-------------|
|     | X           | Y           | Z           | X  | Y           | Z           |             |
| Nb  | -0.03013900 | -0.07464200 | -1.02621900 | Nb | -0.13164800 | 0.25129600  | -0.95009500 |
| Al  | -0.87560300 | 0.95576400  | 1.65931400  | Al | 1.61527900  | -1.69881000 | -1.39762500 |
| Al  | 2.23579500  | -1.34287500 | -1.26251700 | Al | -1.17273700 | 0.82319000  | 1.66754800  |
| Al  | -0.45688000 | -1.81788400 | 1.06110400  | Al | -1.95681900 | 2.24799700  | -0.58208300 |
| Al  | -2.52817000 | 0.98264400  | -0.63908800 | Al | 0.42519200  | -1.48994200 | 1.26569500  |
| Al  | 2.13874600  | 1.46674500  | -0.93598300 | Al | -1.04828100 | -2.33957300 | -0.91232200 |
| Al  | -2.10076800 | -1.73837700 | -1.15220300 | Al | 1.48483400  | 0.91235900  | 1.87670800  |
| Al  | -2.81395000 | -0.72059600 | 1.31794700  | Al | 2.95016500  | -1.00960200 | 0.78454900  |
| Al  | 1.67210100  | -0.04475100 | 1.35872300  | Al | -2.75972400 | -0.24889500 | -0.54243500 |
| Al  | 2.03229400  | -2.57816400 | 1.01652600  | Al | 0.55891400  | 2.68854400  | 0.17173100  |
| Al  | -0.47917900 | 2.55010500  | -0.55240300 | Al | -2.11370900 | -1.64469300 | 1.56750900  |
| Al  | 1.27066700  | 2.52279800  | 1.36511700  | Al | 2.43208300  | 0.96687600  | -0.90282200 |
| 11C |             |             |             |    |             |             |             |
|     | X           | Y           | Z           |    |             |             |             |
| Al  | 2.36021100  | 1.91881800  | 0.66295400  |    |             |             |             |
| Al  | 2.19179000  | 0.36956400  | -1.43846700 |    |             |             |             |
| Al  | 1.19974800  | -2.04212100 | -0.95288000 |    |             |             |             |
| Al  | -0.07572600 | -2.21311400 | 1.38628000  |    |             |             |             |
| Al  | 2.48824600  | -0.90196800 | 1.04970600  |    |             |             |             |
| Al  | -2.06018700 | 2.03164900  | 0.85699300  |    |             |             |             |
| Al  | -0.04149600 | 1.96139300  | -1.20367500 |    |             |             |             |
| Al  | -2.33842000 | -0.69693000 | 1.26273000  |    |             |             |             |
| Al  | -1.50228600 | -1.95987600 | -0.84270200 |    |             |             |             |
| Al  | -0.16292400 | -0.29225600 | -2.38158400 |    |             |             |             |
| Al  | -2.39470900 | 0.54414300  | -1.22678100 |    |             |             |             |
| Nb  | 0.10645900  | 0.40607500  | 0.89650100  |    |             |             |             |

# NbAl<sub>12</sub><sup>-</sup>

## 12A

|    | X           | Y           | Z           |
|----|-------------|-------------|-------------|
| Al | 1.55868500  | -0.33881600 | 1.51873100  |
| Al | -1.07267700 | -1.17952600 | 1.51880200  |
| Al | 2.59523400  | 0.79666700  | -0.91262900 |
| Al | -1.99057300 | 1.84790100  | -0.91331000 |
| Nb | -0.00206100 | 0.00006600  | -0.87826800 |
| Al | -0.48345900 | 1.52088200  | 1.51907300  |
| Al | 2.03243700  | 2.23069100  | 1.22575900  |
| Al | 0.55087800  | 2.65526000  | -0.91330300 |
| Al | -2.57915200 | -0.85403000 | -0.90730100 |
| Al | -2.94375100 | 0.64471800  | 1.23013800  |
| Al | -0.60471800 | -2.64570400 | -0.91430700 |
| Al | 2.02734800  | -1.80517100 | -0.90935000 |
| Al | 0.91624600  | -2.87308300 | 1.22761800  |

## 12B

|    | X           | Y           | Z           |
|----|-------------|-------------|-------------|
| Al | 0.47507700  | -1.79389100 | -1.75118500 |
| Al | -3.47631000 | -0.09943700 | 0.25047100  |
| Al | -1.50088000 | 0.70852000  | 1.73846700  |
| Al | 2.19381600  | 2.26332400  | 0.08831000  |
| Nb | 0.15502900  | 0.65344700  | -0.53680600 |
| Al | 0.35776400  | -1.14738000 | 2.37675600  |
| Al | 1.07270800  | 1.33630000  | 2.20580900  |
| Al | -1.92022600 | -0.43509100 | -1.90256900 |
| Al | 2.42514400  | 0.32197600  | -2.00348400 |
| Al | 2.33283000  | -0.64840900 | 0.46033400  |
| Al | -1.37538000 | -1.69931300 | 0.44094000  |
| Al | 1.00172000  | -2.91813500 | 0.47597000  |
| Al | -2.07520300 | 2.05066400  | -0.68681500 |

## 12C

|    | X           | Y           | Z           |
|----|-------------|-------------|-------------|
| Al | -2.43501000 | 2.25711900  | 0.54135600  |
| Al | -1.44127800 | 0.00114900  | 1.60780000  |
| Al | 0.08864900  | -2.08756500 | 1.41722700  |
| Al | 1.54555500  | -0.00049500 | 1.79755200  |
| Nb | 0.05184600  | 0.00046600  | -0.96065700 |
| Al | 2.03009200  | -1.68720500 | -0.55508200 |
| Al | 3.83851300  | -0.00285700 | 0.20208500  |
| Al | -0.45380500 | 2.57668800  | -1.21517200 |
| Al | 2.03276800  | 1.68490100  | -0.55424000 |
| Al | 0.09012500  | 2.08792400  | 1.41763300  |
| Al | -2.56511500 | -0.00081700 | -0.95677300 |
| Al | -0.45801700 | -2.57481100 | -1.21610200 |
| Al | -2.43599200 | -2.25550100 | 0.54348100  |
